# Supplementary material for: Transcriptomic analysis of pancreatic cancer cells in response to metformin and aspirin: an implication of synergy
Source: PubMed Central journal article supplement (PMC4543968; doi:10.1038/srep13390), 2015-08-21
Supplement: srep13390-s1.pdf [file srep13390-s1.pdf]

## **Supplementary Information**

**Title: Transcriptomic analysis of pancreatic cancer cells in response to metformin and aspirin: an implication of synergy**

**Authors:** Wen Yue<sup>1</sup>, Tao Wang<sup>2</sup>, Emmanuel Zachariah<sup>1</sup>, Yong Lin<sup>1,3</sup>, Chung S. Yang<sup>1,4</sup>, Qing Xu<sup>5</sup>, Robert S. DiPaola<sup>1</sup>, Xiang-Lin Tan<sup>1, 6, †</sup>

**Supplementary Table S1.** Validation of differentially expressed genes in untreated cells and metformin-aspirin treated cells.

| Gene ID | RNA sequencing |           | qRT-PCR     |          |
|---------|----------------|-----------|-------------|----------|
|         | Fold change    | P value   | Fold change | P value* |
| CCL2    | 0.02           | 3.96E-166 | 0.03        | < 0.0001 |
| RASL11A | 0.03           | 9.34E-58  | 0.04        | < 0.0001 |
| CDH18   | 0.07           | 3.10E-29  | 0.07        | < 0.001  |
| AGR2    | 0.07           | 1.17E-26  | 0.03        | < 0.0001 |
| CDH3    | 0.45           | 1.74E-6   | 0.56        | < 0.05   |
| CDH1    | 3.38           | 1.86E-17  | 4.81        | < 0.001  |
| GPR56   | 6.26           | 3.68E-39  | 13.50       | < 0.0001 |
| GPCPD1  | 6.42           | 6.24E-49  | 7.26        | < 0.0001 |
| HES7    | 8.30           | 1.80E-33  | 2.35        | < 0.001  |
| NPTX1   | 20.17          | 1.80E-46  | 6.41        | < 0.0001 |

\* Using one-way ANOVA for comparing treatment with the combination of metformin and aspirin to the untreated control.

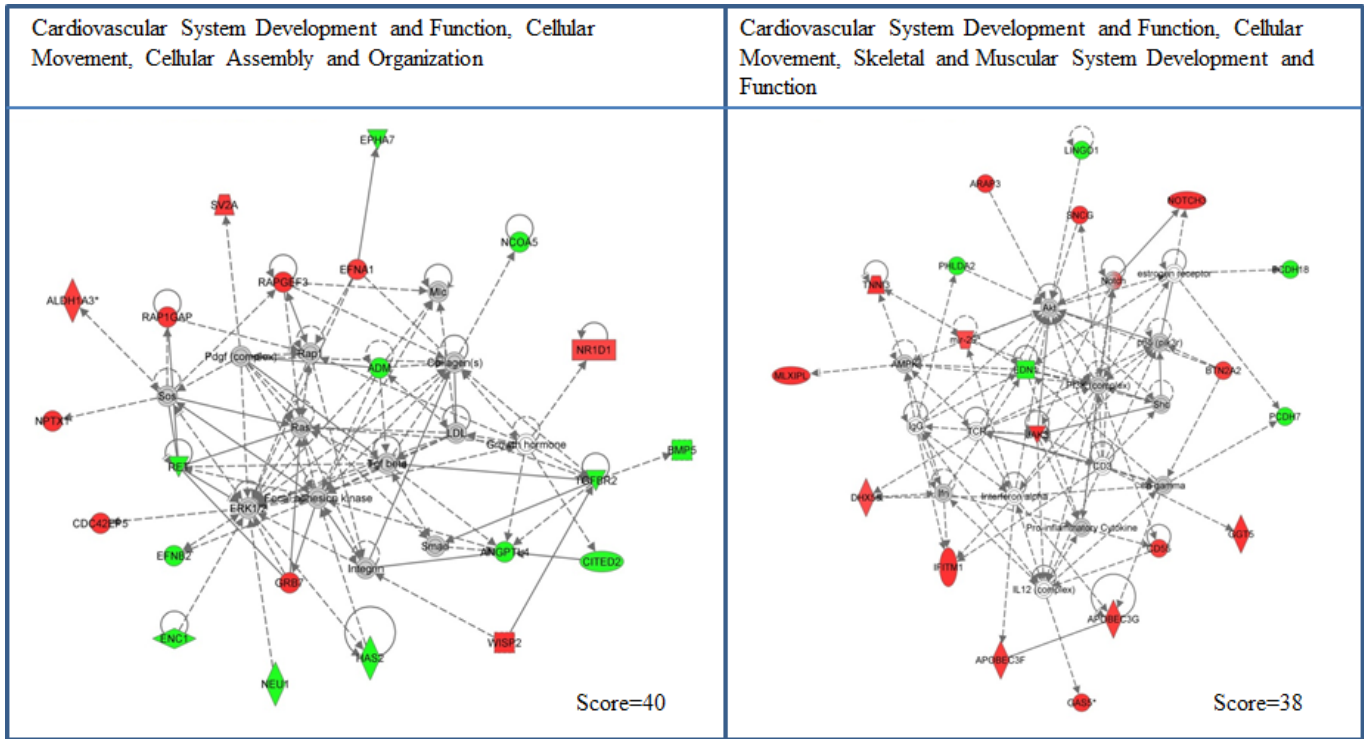

**Supplementary Figure S1.** Network analysis of genes regulated by metformin using IPA software. The networks with the highest 2 scores (which indicates the statistically significance of the interconnection between the molecules depicted in the network) were shown. The color of the molecules indicates the gene expression (red: upregulation; green: downregulation). Continuous lines represent direct interactions while dashed lines represent indirect interactions.

Cellular Compromise, Lipid Metabolism, Small Molecule Biochemistry

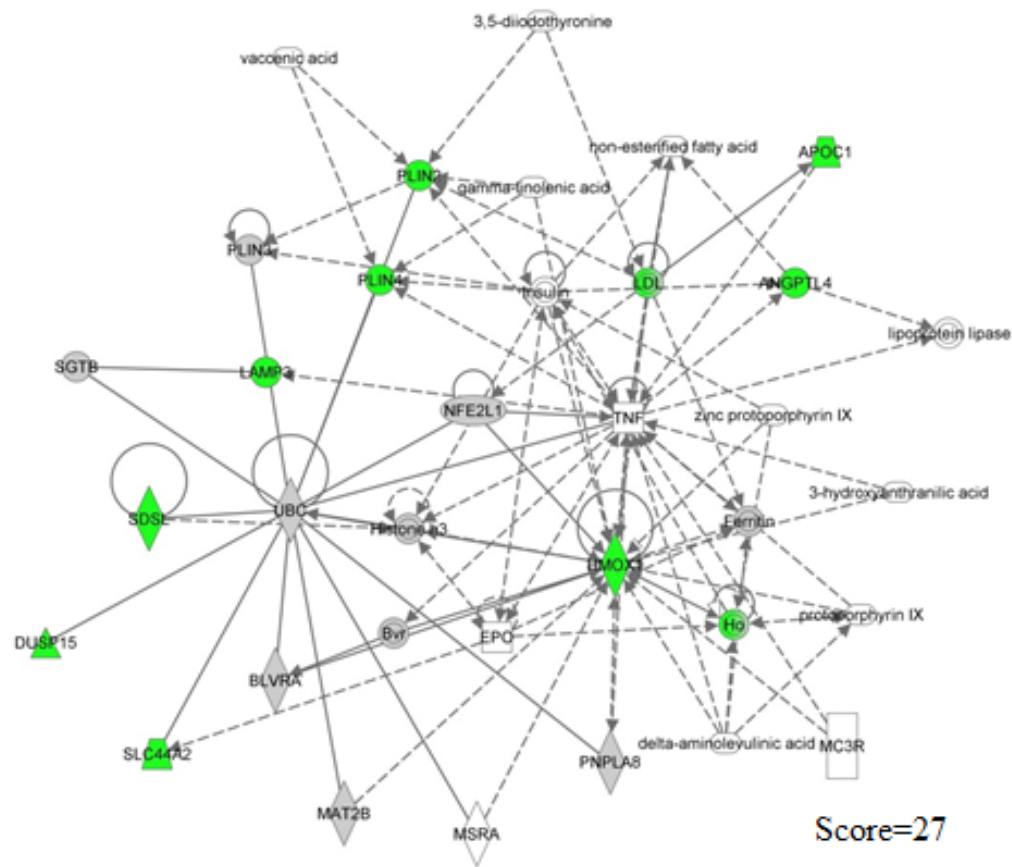

**Supplementary Figure S2.** Network analysis of genes down-regulated by aspirin using IPA software. The network with the highest scores (which indicates the statistically significance of the interconnection between the molecules depicted in the network) were shown. The color of the molecules indicates the gene expression (green: downregulation). Continuous lines represent direct interactions while dashed lines represent indirect interactions.

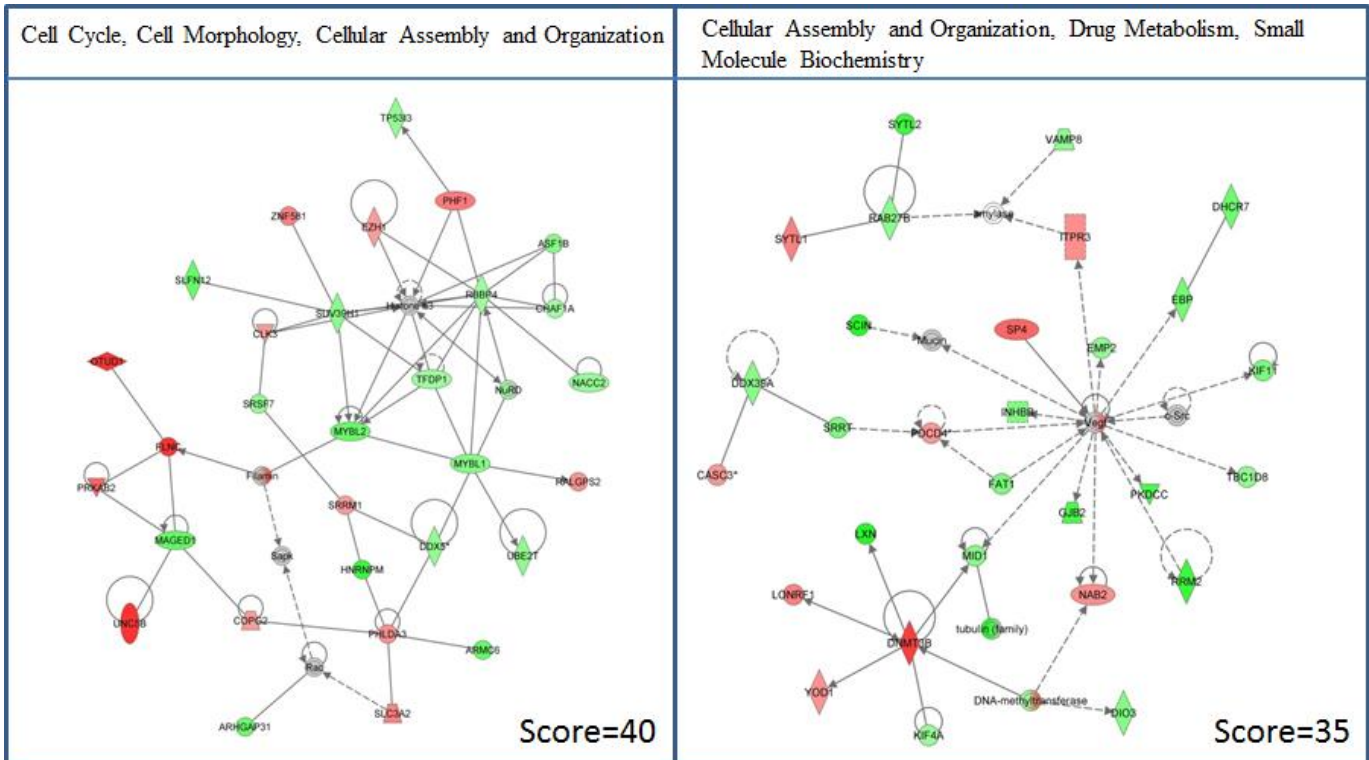

**Supplementary Figure S3.** Network analysis of genes regulated by the combination of metformin and aspirin using IPA software. The networks with the highest 2 scores (which indicates the statistical significance of the interconnection between the molecules depicted in the network) were shown. The color of the molecules indicates the gene expression (red: upregulation; green: downregulation). Continuous lines represent direct interactions while dashed lines represent indirect interactions.
